# Supplementary material for: Non-Viral Episomal Vector Mediates Efficient Gene Transfer of the β-Globin Gene into K562 and Human Haematopoietic Progenitor Cells
Source: MDPI journal article supplement (doi:10.3390/genes14091774), 2023-09-08
Supplement: s1 [file s1]

# Non-Viral Episomal Vector Mediates Efficient Gene Transfer of the $\beta$ -Globin Gene into K562 and Human Haematopoietic Progenitor Cells

Vassileios M. Lazaris <sup>1,†</sup>, Emmanouil Simantirakis <sup>2,†</sup>, Eleana F. Stavrou <sup>1</sup>, Meletios Verras <sup>1</sup>, Argyro Sgourou <sup>3</sup>, Maria K. Keramida <sup>4</sup>, George Vassilopoulos <sup>2</sup> and Aglaia Athanassiadou <sup>1,\*</sup>

<sup>1</sup> Department of General Biology, Medical School, University of Patras, 26504 Patras, Greece; vlazaris@gmail.com (V.M.L.); stauroue@upatras.gr (E.F.S.); meletver@gmail.com (M.V.)

<sup>2</sup> Centre of Basic Research, Biomedical Research Foundation of the Academy of Athens (BRFAA), 11527 Athens, Greece; esimantirakis@gmail.com (E.S.); gvasilop@bioacademy.gr (G.V.)

<sup>3</sup> Biology Laboratory, School of Science and Technology, Hellenic Open University, 26335 Patras, Greece; sgourou@eap.gr

<sup>4</sup> IVF and Andrology Labs, IVF Unit, General University Hospital of Patras, 26504 Patras, Greece; maria\_keram@yahoo.gr

\* Correspondence: athanass@med.upatras.gr

† These authors contributed equally to this work.

**Supplementary Materials:** The following is supporting information.

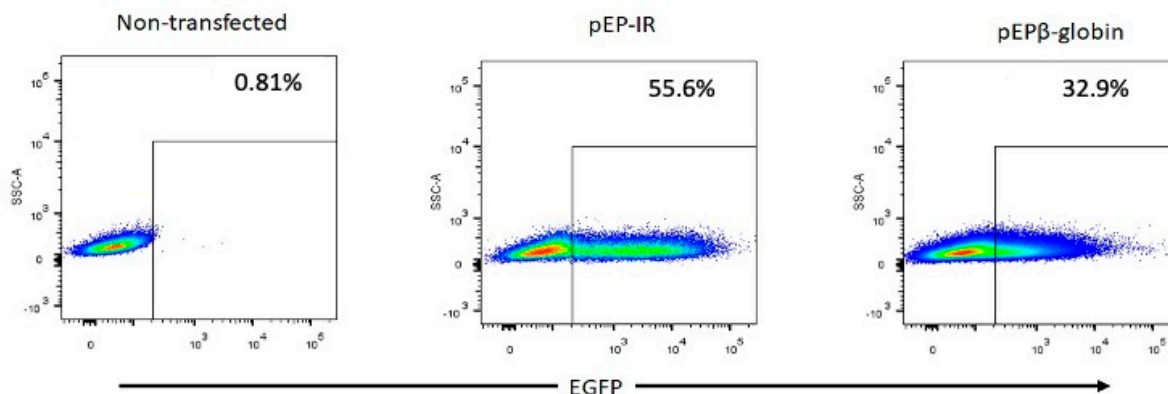

**Figure S1.** Flow cytometry of transfection efficiencies. CD34<sup>+</sup> cells, non-transfected, transfected with plasmid pEP-IR and transfected with plasmid pEPβ-globin.

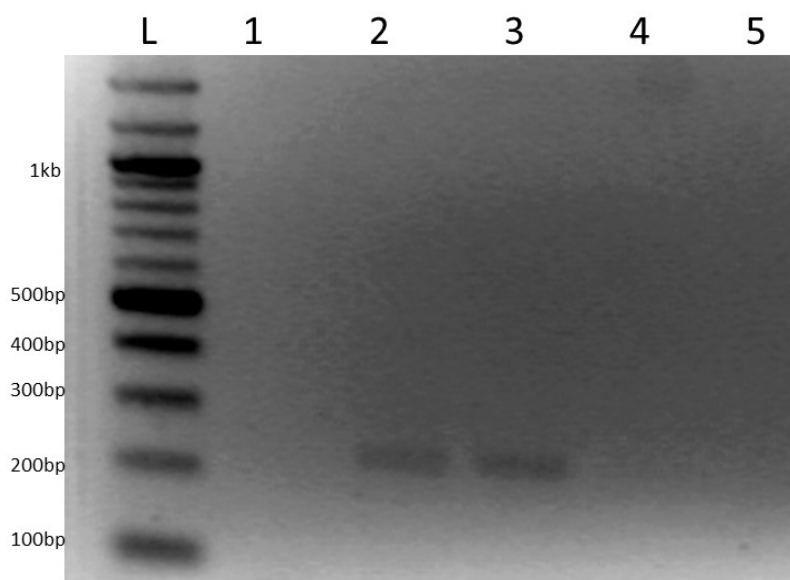

**Figure S2.** PCR test for plasmid detection in DNA from CFC colony cells. L. 100bp DNA ladder NEB New England; 1. CFC colony cells transfected with pEP-IR, non-fluorescent; 2. CFC colony cells transfected with pEP-IR, Fluorescent; 3. CFC colony cells transfected with pEPβ-globin, Fluorescent; 4 CFC colony cells transfected with pEPβ-globin, non-Fluorescent; 5. Empty slot.

**Table S1.** Nucleofections to determine transfection efficiencies for transfections into CD34+ cells. Nucleo 1 to 5 are the nucleofections carried out, along with the respective data –columns for non-transfected CD34+ cells, CD34+ cells transfected with plasmid pEP-IR and CD34+ cells transfected with pEP $\beta$ -globin. The three last rows provide data from statistical analysis.

| Nucleofection | Non- transfected | pEP-IR     | pEP-bglobin |
|---------------|------------------|------------|-------------|
| nucleo1       | 0.89             | 18.3       |             |
| nucleo2       | 1.95             | 10.2       | 8.44        |
| nucleo3       | 0.81             | 32.6       | 11.8        |
| nucleo4       | 1.3              | 11.5       | 9.15        |
| nucleo5       | 0.89             | 55.6       | 32.9        |
| average       | 1.168            | 25.64      | 15.5725     |
| Stand-dev     | 0.47740968       | 18.9621465 | 11.6418079  |
| SEM           | 0.2135041        | 8.48012972 | 5.82090396  |
